# Supplementary material for: Identification of Distinct Clinical Phenotypes of Critically Ill COVID-19 Patients: Results from a Cohort Observational Study
Source: MDPI journal article supplement (doi:10.3390/jcm12083035), 2023-04-21
Supplement: s1 [file s1]

## Supplementary Material

Title: Identification of Distinct Clinical Phenotypes of Critically Ill COVID-19 Patients: Results from a Cohort Observational Study

José Pedro Cidade, Vicente Cés de Souza Dantas, Alessandra de Figueiredo Thompson, Renata Carnevale Carneiro Chermont de Miranda, Rafaela Mamfrim, Henrique Caroli, Gabriela Escudini, Natalia Oliveira, Taiza Castro, Renata Oliveira, Pedro Póvoa

**Table S1–** Principal Components analysis (PCA) of the cluster dataset

| Explained total variance                |                     |               |              |                                     |               |              |
|-----------------------------------------|---------------------|---------------|--------------|-------------------------------------|---------------|--------------|
| Component                               | Initial eigenvalues |               |              | Extraction Sums of Squared Loadings |               |              |
|                                         | Total               | % of variance | % cumulative | Total                               | % of variance | % cumulative |
| C-reactive Protein serum level          | 1,602               | 53,416        | 53,416       | 1,602                               | 53,416        | 53,416       |
| Procalcitonin serum level               | 1,010               | 33,677        | 87,092       | 1,010                               | 33,677        | 87,092       |
| Il-6 serum level                        | 1,005               | 9,908         | 97,000       | 1,005                               | 9,908         | 97,000       |
| Leukocyte count                         | ,561                | 1,810         | 98,81        |                                     |               |              |
| D-dimer serum level                     | ,471                | ,908          | 99,72        |                                     |               |              |
| Lymphocyte count                        | ,387                | ,028          | 100,000      |                                     |               |              |
| Note: Kaiser-Meyer-Olkin measure: 0.895 |                     |               |              |                                     |               |              |

**Table S2–** Demographic, clinical and outcome variables of patients between Phenotypes B and C\*

|                            | PHENOTYPE B<br>(n=244; 24%) | PHENOTYPE C<br>(n=163; 16%) | p <sup>‡</sup> |
|----------------------------|-----------------------------|-----------------------------|----------------|
| Age, years, (median (IQR)) | 62 (47-79)                  | 63 (47-80)                  | 0.9            |

|                                                                   |                   |                   |                  |
|-------------------------------------------------------------------|-------------------|-------------------|------------------|
| Gender, males, (n, %)                                             | 131 (53.7%)       | 78 (47.9%)        | 0.08             |
| <b>Previous Medical Comorbidities</b>                             |                   |                   |                  |
| Chronic Obstructive Pulmonary Disease (n, %)                      | 18 (7.4%)         | 14 (8.9%)         | 0.09             |
| Asthma (n, %)                                                     | 8 (3.3%)          | 5 (3.1%)          | 0.45             |
| Chronic Kidney Disease (n, %)                                     | 29 (11.9%)        | 23 (14.1%)        | 0.127            |
| Obesity (n, %)                                                    | 36 (14.8%)        | 27 (16.7%)        | 0.298            |
| Diabetes Mellitus (n, %)                                          | 82 (33.6%)        | 47 (28.8%)        | 0.12             |
| Ischemic Cardiopathy (n, %)                                       | 64 (26.2%)        | 39 (23.9%)        | 0.659            |
| SOFA at admission (median (IQR))                                  | 3 (2;5)           | 1 (0; 3)          | <b>0.04</b>      |
| SAPS III at admission (mean $\pm$ SD)                             | 50 $\pm$ 7        | 47 $\pm$ 12       | 0.413            |
| Mechanical Ventilation (n, %)                                     | 11 (4.6%)         | 11 (6.9%)         | 0.06             |
| Vasopressor Support (n, %)                                        | 38 (15.6%)        | 38 (14.4%)        | 0.318            |
| Renal replacement therapy (n, %)                                  | 19 (7.8%)         | 19 (11.6%)        | 0.59             |
| <b>Laboratory results</b>                                         |                   |                   |                  |
| C reactive Protein at admission, mg/dL (median (IQR))             | 20.0 (10.3; 40.6) | 17.20 (4.0; 23.7) | <b>0.001</b>     |
| Max registered C-Reactive protein, mg/dL (mean $\pm$ SD)          | 25.3 $\pm$ 10.4   | 18.6 $\pm$ 12.5   | <b>&lt;0.001</b> |
| Procalcitonin at admission, ng/mL (median (IQR))                  | 0.17 (0.05; 0.23) | 0.22 (0.12; 0.23) | <b>0.02</b>      |
| Max registered Procalcitonin, ng/mL (median (IQR))                | 0.34 (0.06; 0.74) | 1.30 (0.70; 1.40) | <b>0.035</b>     |
| D-dimer level at admission, ng/mL (median (IQR))                  | 610 (97; 753)     | 202 (119; 262)    | <b>0.001</b>     |
| Max D-dimer registered, ng/mL (median (IQR))                      | 655 (48; 1305)    | 303 (78; 307)     | <b>0.001</b>     |
| Minimum Leucocyte count registered, $\times 10^9$ (mean $\pm$ SD) | 5.0 $\pm$ 2.03    | 5.3 $\pm$ 2.2     | <b>&lt;0.001</b> |
| Minimum Lymphocyte count registered, $\times 10^9$ (median (IQR)) | 0.36 (0.12; 0.39) | 0.57 (0.68; 1.09) | 0.745            |
| IL-6 serum levels, mg/mL (median (IQR))                           | 35.4 (6.6; 42.7)  | 41.0 (16.0; 49.0) | <b>0.001</b>     |
| Remdesivir, (n, %)                                                | 243 (99.6%)       | 147 (90.2%)       | <b>0.03</b>      |
| Corticosteroid therapy (n, %)                                     | 137 (97.9%)       | 147 (90.0%)       | <b>0.001</b>     |
| Ventilator-free days, days, (median (IQR))                        | 12 (4; 20)        | 10 (4;17)         | 0.568            |
| ICU length of stay, days, (median (IQR))                          | 6 (5; 11)         | 10 (3; 10)        | <b>0.01</b>      |
| Hospital Length of stay, days, (mean $\pm$ sd)                    | 9 (1; 14)         | 13 (2; 14)        | <b>0.001</b>     |
| Mortality, (n, %)                                                 | 17 (7.0%)         | 2 (1.2%)          | <b>&lt;0.001</b> |

\* IQR denotes Interquartile range and SD denotes standard deviation

¥ p-values were determined using Chi-square test, ANOVA test and Kruskal-Wallis H test

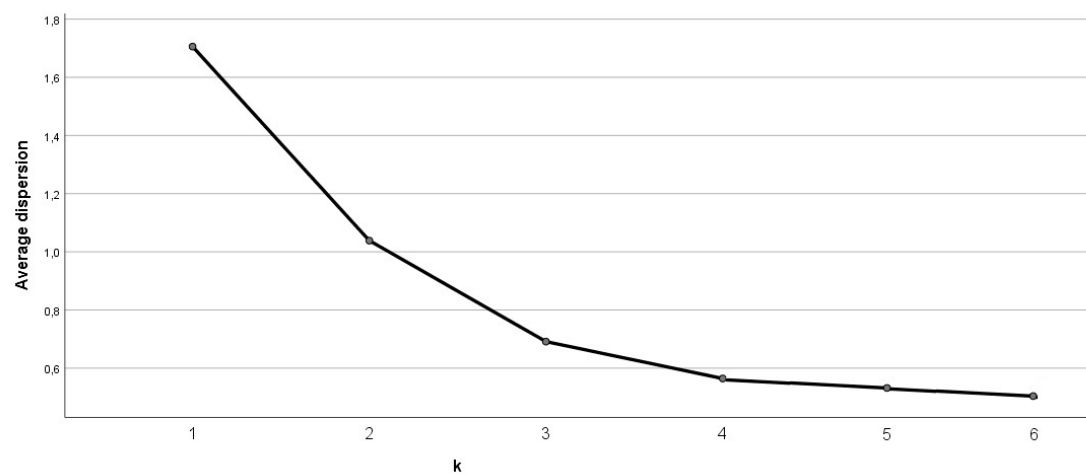

**Figure S1**– Principal Component analysis using elbow method of the cluster dataset
